# Supplementary material for: Transcriptomic Analysis of Mecp2 Mutant Mice Reveals Differentially Expressed Genes and Altered Mechanisms in Both Blood and Brain
Source: PubMed Central journal article supplement (PMC6501143; doi:10.3389/fpsyt.2019.00278), 2019-04-29
Supplement: Image_1.pdf [file Image_1.pdf]

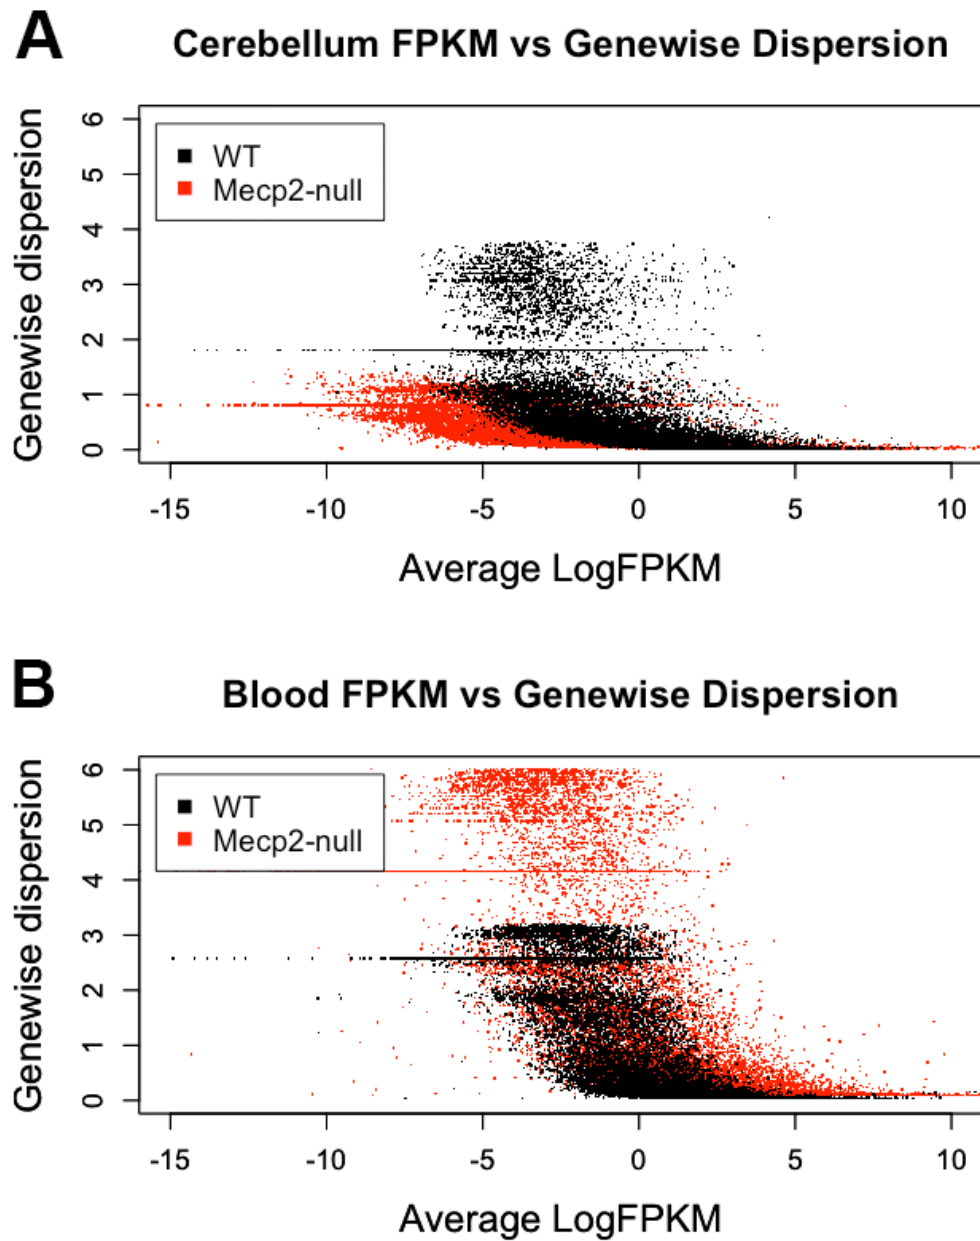

**Supplementary Figure 1.** Scatterplot of average gene expression (in logFPKM) versus genewise dispersion in cerebellum (A) and blood (B). Black and red colours represent WT and Mecp2-null data, respectively.
