# Supplementary material for: Transcriptomic Analysis of Mecp2 Mutant Mice Reveals Differentially Expressed Genes and Altered Mechanisms in Both Blood and Brain
Source: PubMed Central journal article supplement (PMC6501143; doi:10.3389/fpsyt.2019.00278), 2019-04-29
Supplement: Image_2.pdf [file Image_2.pdf]

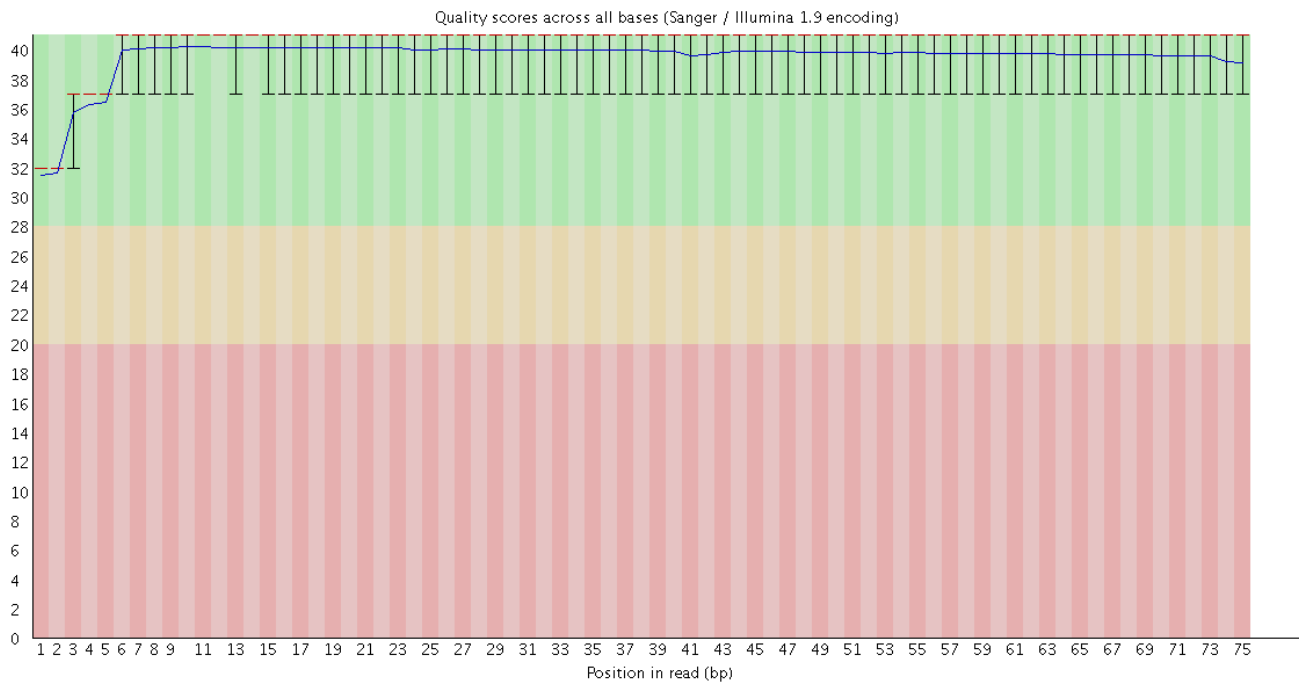

**Supplementary Figure 2.** Representative example of quality control of the sequencing reads obtained using FastQC. The y axis represents the mean quality score for each read position. Values in the green area are considered of good quality.
