# Supplementary material for: Transcriptomic Analysis of Mecp2 Mutant Mice Reveals Differentially Expressed Genes and Altered Mechanisms in Both Blood and Brain
Source: Front Psychiatry. 2019 Apr 29;10:278. doi: 10.3389/fpsyt.2019.00278 (PMC6501143; doi:10.3389/fpsyt.2019.00278)
Supplement: Supplementary file 5 [file Table_5.xlsx]

## Sheet: Sheet1
RT-qPCR validation of additional genes
Tissue overlap
Gene	ddCt qPCR		P value qPCR		log2FC RNAseq		FDR RNAseq
	Blood	Cerebellum	Blood	Cerebellum	Blood	Cerebellum	Blood	Cerebellum
Dnah14	NA	0.84	NA	0.311	8.54	2.04	0.215	0.0251
Serpina1c	-4.11	-2.84	0.077	0.00013	9.87	-10.52	0.256	0.0276
Lsm12	0.51	-0.23	0.055	0.074	-1.3	1.91	0.599	5.39e-19
Mup10	-2.67	NA	0.24	NA	7.12	0.03	0.653	0.033
Ankrd63	NA	-1.97	NA	0.025	8.9	2.07	0.0379	0.118
Slc6a4	-0.08	-2.17	0.84	0.46	-1.99	2.75	0.0227	0.591
Crispld2	0.62	0.24	0.53	0.044	2.54	0.66	0.0487	0.604
Tnnc2	-1.3	-0.35	0.633	0.78	10.97	3.44	6.73e-09	0.618
Mpo	3.55	-3.4	0.47	0.04	10.18	1.18	1.75e-06	0.779
Gpx3	0.29	-0.93	0.23	0.29	3.03	0.73	0.0164	0.842
Paip2	0.27	-0.07	0.43	0.7	-1.06	1	0.61	0.000106
Fkbp5	-0.19	0.17	0.788	0.72	1.4	1.33	0.241	0.037
High fold change in blood
Gene	ddCt qPCR		P value qPCR		log2FC RNAseq		FDR RNAseq
S100a9	-0.12		0.8		2.87		0.0201
Snx31	0.97		0.083		-8.8		0.00309
Ms4a3	NA		NA		13.0534		0.0052731
Prg3	0.32		0.62		12.26		0.00527
Genes from predicted dysregulated pathways (blood)
Gene	ddCt qPCR		P value qPCR		log2FC RNAseq		FDR RNAseq
Gsta3	2.607		0.025		8.98		0.00406
Gstm2	-0.179		0.72		7.56		0.000234
Itgb3	-0.432		0.12		-3.15		0.001
